# Supplementary material for: Enhancing the stability of silver nanoparticles in biomimetic environments through biomembrane hybridization
Source: Royal Society of Chemistry journal article supplement (doi:10.1039/d5lf00329f), 2026-01-01
Supplement: d5lf00329f1.pdf [file d5lf00329f1.pdf]

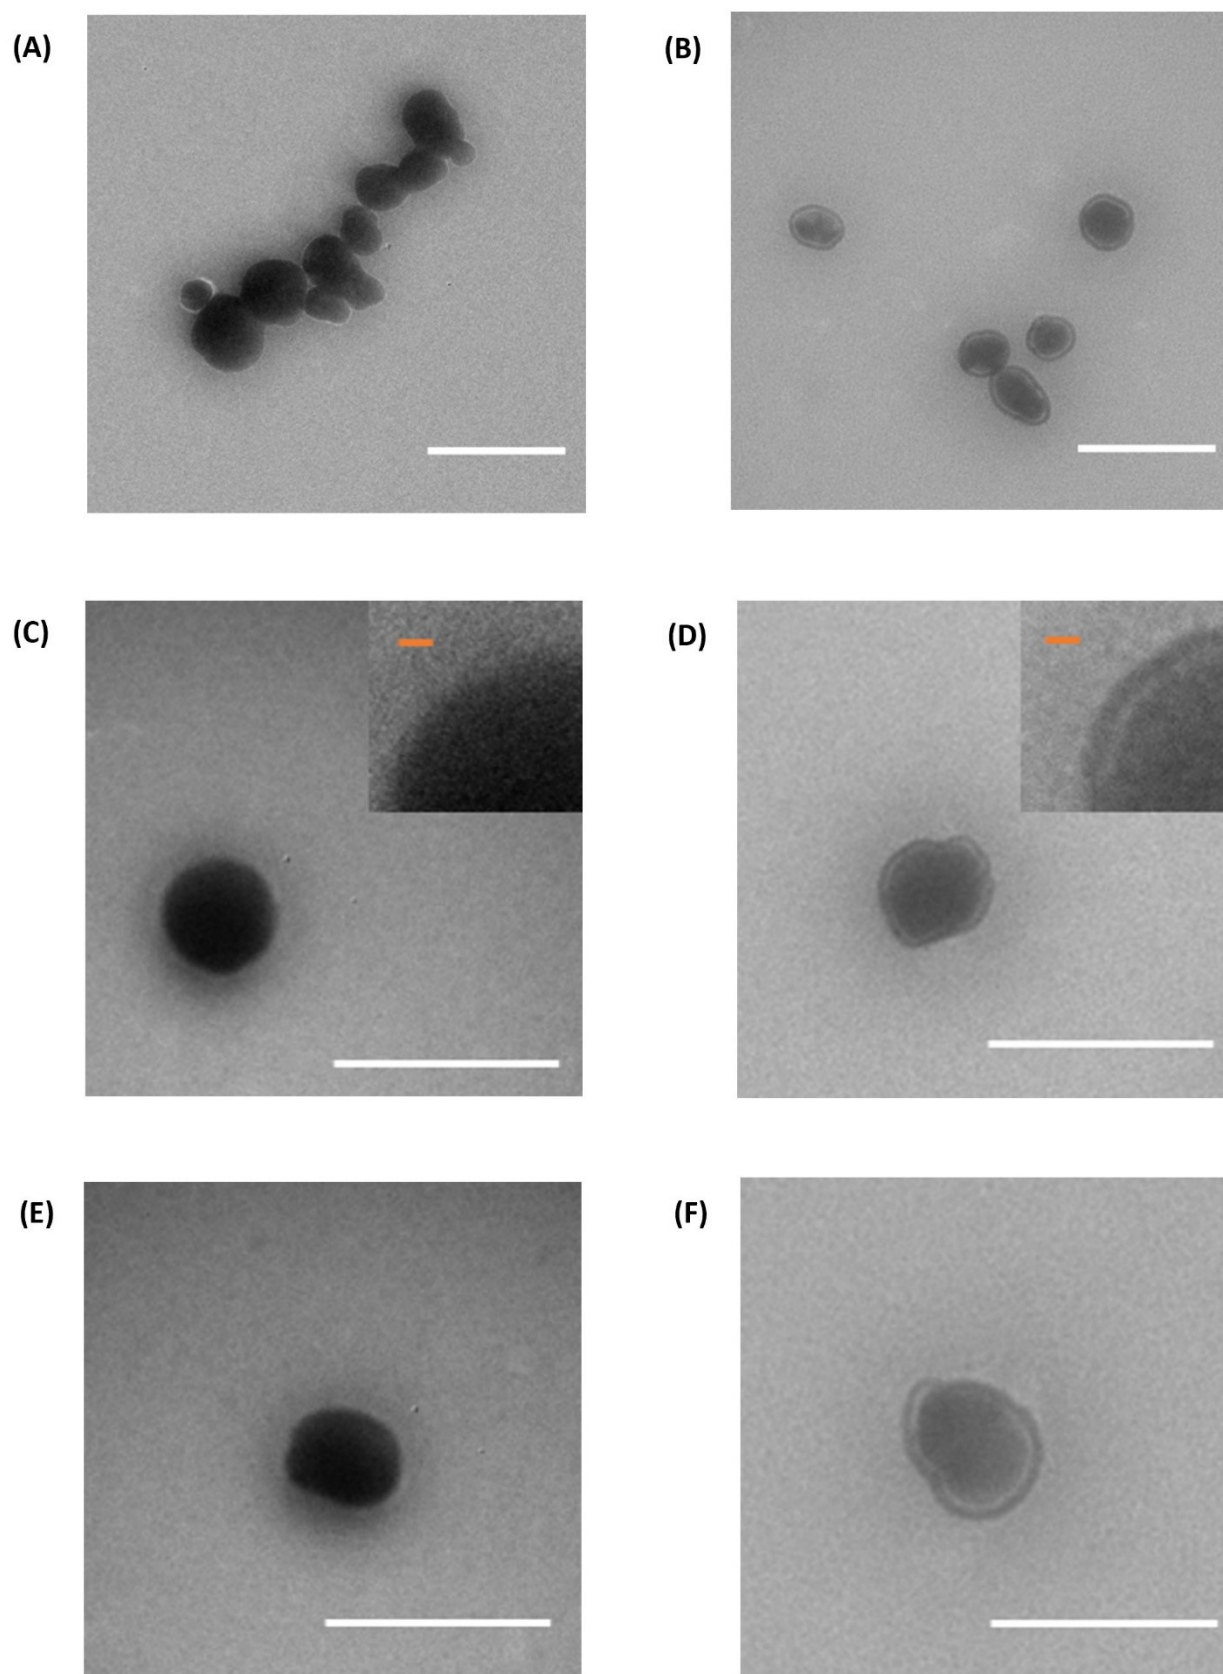

Fig S1. TEM images of AgNPs (A, C, E) and Hybrid (B, D, F). Scale bar (White) is 200 nm. Scale bar (Orange) is 10 nm.

Table: Phospholipid profile of Biomembrane hybrid silver nanoparticles, related to Fig 3.

Abbreviations: phosphatidylcholines; PC, phosphatidylethanolamines; PE, phosphatidylserines; PS, phosphatidylglycerols; PG, phosphatidylinositol; PI, sphingomyelins; SM, lysophosphatidylcholines; LPC, lysophosphatidylethanolamines; LPE, lysophosphatidylglycerols; LPG, lysophosphatidylinositols; LPI. Lipids are denoted by class abbreviations and by the total number of carbon atoms and double bonds in the fatty acyl chains, shown as (carbon: number of double bonds)

| Lipid names | Conc. (ug/mL) | Content. (%) |
|-------------|---------------|--------------|
| PG(32:0)    | 649.13        | 19.57        |
| PC(36:2)    | 526.24        | 15.86        |
| PC(38:2)    | 360.03        | 10.85        |
| PE(36:2)    | 281.71        | 8.49         |
| PC(34:1)    | 255.57        | 7.70         |
| SM(40:1)    | 169.59        | 5.11         |
| PE(30:1)    | 98.15         | 2.96         |
| SM(40:7)    | 78.33         | 2.36         |
| PG(36:2)    | 75.01         | 2.26         |
| PG(28:0)    | 70.39         | 2.12         |
| PC(38:1)    | 61.26         | 1.85         |
| PE(34:1)    | 47.51         | 1.43         |
| PE(30:0)    | 46.77         | 1.41         |
| PE(36:1)    | 44.46         | 1.34         |
| LPG(20:3)   | 41.64         | 1.26         |
| LPG(20:4)   | 41.26         | 1.24         |
| PC(36:4)    | 33.75         | 1.02         |
| PG(28:2)    | 31.25         | 0.94         |
| PC(40:2)    | 30.00         | 0.90         |
| PC(36:0)    | 23.75         | 0.72         |
| LPC(16:0)   | 23.75         | 0.72         |
| PC(34:0)    | 20.00         | 0.60         |
| PE(34:2)    | 18.75         | 0.57         |
| PC(36:3)    | 16.25         | 0.49         |
| LPG(14:0)   | 16.25         | 0.49         |
| LPG(20:0)   | 15.00         | 0.45         |
| LPG(22:1)   | 15.00         | 0.45         |
| PC(34:2)    | 15.00         | 0.45         |
| SM(34:1)    | 15.00         | 0.45         |
| PC(30:1)    | 13.75         | 0.41         |
| PC(38:6)    | 12.50         | 0.38         |

| Lipid names | Conc. (ug/mL) | Content. (%) |
|-------------|---------------|--------------|
| LPE(14:1)   | 12.50         | 0.38         |
| PE(38:2)    | 12.44         | 0.37         |
| LPG(16:0)   | 11.25         | 0.34         |
| SM(36:1)    | 11.25         | 0.34         |
| LPE(14:0)   | 10.00         | 0.30         |
| LPC(14:0)   | 10.00         | 0.30         |
| LPC(18:1)   | 10.00         | 0.30         |
| LPC(18:2)   | 10.00         | 0.30         |
| PC(38:5)    | 10.00         | 0.30         |
| PE(34:0)    | 10.00         | 0.30         |
| LPG(14:1)   | 10.00         | 0.30         |
| PC(32:1)    | 7.50          | 0.23         |
| PC(40:1)    | 7.50          | 0.23         |
| PE(28:0)    | 7.50          | 0.23         |
| PE(32:1)    | 7.50          | 0.23         |
| LPG(16:1)   | 7.50          | 0.23         |
| LPG(22:0)   | 7.50          | 0.23         |
| LPG(22:6)   | 7.50          | 0.23         |
