# Supplementary figures and images for: Enhancing the stability of silver nanoparticles in biomimetic environments through biomembrane hybridization
Source: Royal Society of Chemistry journal article supplement (doi:10.1039/d5lf00329f), 2026-01-01

(A)

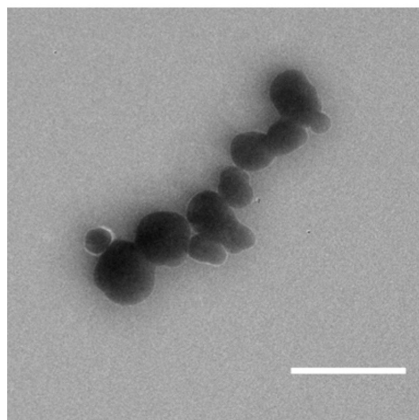

(B)

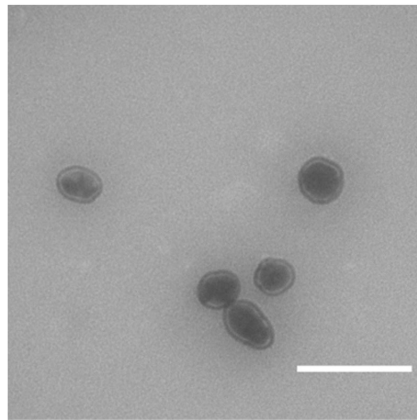

(C)

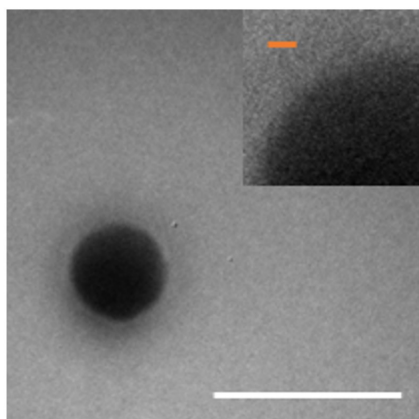

(D)

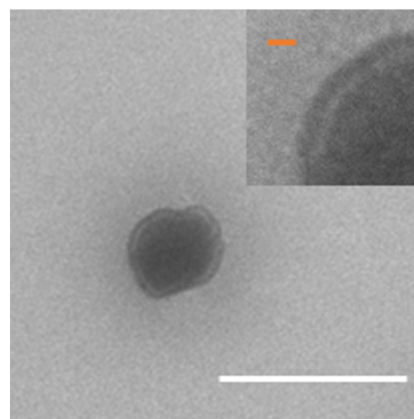

(E)

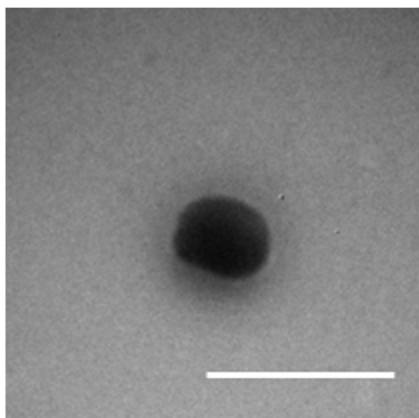

(F)

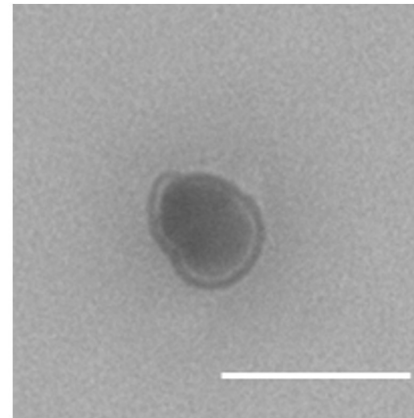

Supplement: d5lf00329f2.pdf [file d5lf00329f2.pdf]
